# Supplementary material
Source: PubMed Central journal article supplement (PMC4157961)
Supplement: NIHMS622356-supplement-Supplement.pdf [file NIHMS622356-supplement-Supplement.pdf]

**Table 1.** Univariate analysis of predictors of any intracranial hemorrhage after endovascular stroke therapy.

| Variable                   | Any Intracranial Hemorrhage (n=363), N(%) | No Hemorrhage (n=759), N(%) | p-value       |
|----------------------------|-------------------------------------------|-----------------------------|---------------|
| <b>Demographics</b>        |                                           |                             |               |
| Age (years±SD)             | 67±15                                     | 66±15                       | 0.49          |
| NIHSS (mean±SD)            | 17±5                                      | 16±6                        | <b>0.001</b>  |
| Female                     | 174 (48)                                  | 366 (48)                    | 0.94          |
| Diabetes Mellitus          | 109 (30)                                  | 156 (20)                    | <b>0.0001</b> |
| Hypertension               | 255 (71)                                  | 518 (68)                    | 0.53          |
| Atrial Fibrillation        | 148 (41)                                  | 265 (35)                    | <b>0.05</b>   |
| Time to treatment (min±SD) | 312±157                                   | 296±162                     | 0.15          |
| TIMI 2-3 Recanalization    | 247 (68)                                  | 520 (69)                    | 0.89          |
| <b>Clot Location</b>       |                                           |                             |               |
| M1 MCA                     | 192 (53)                                  | 369 (49)                    | 0.20          |
| Carotid terminus           | 72 (20)                                   | 142 (19)                    | 0.69          |
| Tandem Occlusion           | 47 (13)                                   | 94 (12)                     | 0.43          |
| M2 MCA                     | 43 (12)                                   | 129 (17)                    | <b>0.03</b>   |
| Extracranial ICA           | 10 (3)                                    | 25 (3)                      | 0.71          |
| <b>Therapy</b>             |                                           |                             |               |
| Intravenous t-PA           | 137(38)                                   | 234 (31)                    | <b>0.025</b>  |
| Merci Embolectomy          | 130 (36)                                  | 233 (30)                    | <b>0.002</b>  |
| Penumbra Thrombectomy      | 42 (11)                                   | 88 (12)                     | 0.82          |
| Angioplasty                | 97 (27)                                   | 189 (25)                    | 0.56          |
| Stent placement            | 70 (19)                                   | 145(19)                     | 0.51          |

|                            |          |          |      |
|----------------------------|----------|----------|------|
| IA t-PA                    | 194 (53) | 408 (54) | 0.49 |
| Pharmacologic Therapy Only | 73 (20)  | 191 (25) | 0.07 |
| Mechanical Therapy Only    | 91 (25)  | 184 (24) | 0.41 |
| Multimodal Therapy         | 199 (54) | 385 (51) | 0.20 |

**Table 2.** Independent predictors of development of any intracranial hemorrhage after endovascular stroke therapy.

| Variable          | Odds Ratio [95% CI] | p-value       |
|-------------------|---------------------|---------------|
| Diabetes Mellitus | 1.71 [1.27-2.30]    | <b>0.0001</b> |
| Merci Device      | 1.51 [1.05-2.18]    | <b>0.025</b>  |
| NIHSS             | 1.03 [1.008-1.059]  | <b>0.009</b>  |

**Table 3.** Univariate analysis for the predictors of the development of hemorrhagic infarction (HI) after endovascular stroke therapy.

| Variable                   | HI Hemorrhage (n=267), N(%) | No Hemorrhage (n=759), N(%) | p-value       |
|----------------------------|-----------------------------|-----------------------------|---------------|
| <b>Demographics</b>        |                             |                             |               |
| Age (years±SD)             | 66±16                       | 66±15                       | 0.95          |
| NIHSS (mean±SD)            | 17±5                        | 16±6                        | <b>0.004</b>  |
| Female                     | 139 (52)                    | 393 (52)                    | 0.94          |
| Diabetes Mellitus          | 88 (33)                     | 156 (21)                    | <b>0.0001</b> |
| Hypertension               | 182 (68)                    | 518 (68)                    | 0.91          |
| Atrial Fibrillation        | 100 (37)                    | 265 (35)                    | 0.45          |
| Time to treatment (min±SD) | 320±161                     | 296±162                     | <b>0.05</b>   |
| TIMI 2-3 Recanalization    | 180 (67)                    | 520 (69)                    | 0.39          |

| <b>Clot Location</b>       |          |          |              |
|----------------------------|----------|----------|--------------|
| M1 MCA                     | 140 (52) | 369 (49) | 0.29         |
| Carotid terminus           | 56 (21)  | 142 (19) | 0.42         |
| Tandem Occlusion           | 34 (13)  | 94 (12)  | 0.91         |
| M2 MCA                     | 30 (11)  | 129 (17) | <b>0.03</b>  |
| Extracranial ICA           | 8 (3)    | 25 (3)   | 0.50         |
| <b>Therapy</b>             |          |          |              |
| Intravenous t-PA           | 108 (40) | 234 (31) | <b>0.005</b> |
| Merci Embolectomy          | 172 (64) | 411 (54) | <b>0.002</b> |
| Penumbra Thrombectomy      | 28 (10)  | 88 (12)  | 0.66         |
| Angioplasty                | 70 (26)  | 189 (25) | 0.68         |
| Stent placement            | 49 (18)  | 145 (19) | 0.86         |
| IA t-PA                    | 155 (58) | 408 (54) | 0.22         |
| Pharmacologic Therapy Only | 58 (22)  | 191 (25) | 0.28         |
| Mechanical Therapy Only    | 57 (21)  | 184 (25) | 0.35         |
| Multimodal Therapy         | 152 (57) | 385(51)  | 0.09         |

**Table 4.** Independent predictors of hemorrhagic infarction (HI) after endovascular stroke therapy.

| Variable                             | Odds Ratio [95% CI] | p-value       |
|--------------------------------------|---------------------|---------------|
| Diabetes Mellitus                    | 2.27 [1.58-3.26]    | <b>0.0001</b> |
| Time from Symptoms Onset to Puncture | 1.001 [1.00-1.002]  | <b>0.026</b>  |

|                              |                  |              |
|------------------------------|------------------|--------------|
| Merci Device                 | 1.47 [1.02-2.12] | <b>0.032</b> |
| IV tPA prior to intervention | 1.43 [1.03-2.08] | <b>0.037</b> |

**Table 5.** Univariate analysis of predictors of parenchymal hematoma (PH) after endovascular stroke therapy.

| Variable                      | PH<br>(n=96), N(%) | No ICH<br>(n=759), N(%) | p-value      |
|-------------------------------|--------------------|-------------------------|--------------|
| <b>Demographics</b>           |                    |                         |              |
| Age (years±SD)                | 69±14              | 66±16                   | <b>0.09</b>  |
| NIHSS (mean±SD)               | 18±6               | 16±6                    | <b>0.009</b> |
| Female                        | 50 (52)            | 393 (52)                | 0.85         |
| Diabetes Mellitus             | 21 (22)            | 156 (21)                | 0.44         |
| Hypertension                  | 73 (76)            | 518 (68)                | 0.09         |
| Atrial Fibrillation           | 48 (50)            | 265 (35)                | <b>0.003</b> |
| Time to treatment<br>(min±SD) | 290±139            | 296±162                 | 0.75         |
| TIMI 2-3<br>Recanalization    | 67 (70)            | 520 (69)                | 0.91         |
| <b>Clot Location</b>          |                    |                         |              |
| M1 MCA                        | 52 (54)            | 369 (49)                | 0.18         |
| Carotid terminus              | 16 (17)            | 142 (19)                | 0.37         |
| Tandem Occlusion              | 13 (14)            | 94 (12)                 | 0.74         |
| M2 MCA                        | 13 (13)            | 129 (17)                | 0.47         |
| Extracranial ICA              | 2 (2)              | 25 (3)                  | 0.76         |
| <b>Therapy</b>                |                    |                         |              |
| Intravenous t-PA              | 29 (30)            | 234 (31)                | 0.50         |
| Merci<br>Embolectomy          | 61 (63)            | 411 (54)                | 0.05         |
| Penumbra                      | 14 (15)            | 88 (12)                 | 0.25         |

|                            |         |          |              |
|----------------------------|---------|----------|--------------|
| Thrombectomy               |         |          |              |
| Angioplasty                | 27 (28) | 189 (25) | 0.53         |
| Stent placement            | 21(22)  | 145 (19) | 0.31         |
| IA t-PA                    | 39 (41) | 408 (54) | <b>0.009</b> |
| Pharmacologic Therapy Only | 15 (16) | 191 (25) | <b>0.02</b>  |
| Mechanical Therapy Only    | 34 (35) | 184 (24) | <b>0.014</b> |
| Multimodal Therapy Only    | 47 (49) | 385 (51) | 0.41         |

**Table 6.** Independent predictors of parenchymal hematoma (PH) after endovascular stroke therapy.

| Variable            | Odds Ratio [95% CI] | p-value |
|---------------------|---------------------|---------|
| IA t-PA             | 0.57 [0.35-0.90]    | 0.008   |
| Atrial fibrillation | 1.61 [1.01-2.55]    | 0.045   |
| NIHSS               | 1.04 [0.999-1.08]   | 0.056   |
